# Supplementary material for: Europium-engineered iron oxide nanocubes with high T1and T2contrast abilities for MRI in living subjects
Source: Royal Society of Chemistry journal article supplement (doi:10.1039/c5nr00774g), 2015-01-01
Supplement: c5nr00774g1.pdf [file c5nr00774g1.pdf]

## Electronic Supplementary Information

### **Europium-engineered iron oxide nanocubes with high $T_1$ and $T_2$ contrast abilities for MRI in living subjects**

*Lijiao Yang,<sup>†</sup> Zijian Zhou,<sup>†</sup> Hanyu Liu,<sup>†</sup> Changqiang Wu,<sup>‡</sup> Hui Zhang,<sup>†</sup> Guoming Huang,<sup>†</sup> Hua Ai<sup>‡</sup>  
and Jinhao Gao<sup>\*,†</sup>*

<sup>†</sup>State Key Laboratory of Physical Chemistry of Solid Surfaces, The Key Laboratory for Chemical Biology of Fujian Province, and Department of Chemical Biology, College of Chemistry and Chemical Engineering, Xiamen University, Xiamen 361005, China. <sup>‡</sup>National Engineering Research Center for Biomaterials, Sichuan University, Chengdu 610064, China.

Email: [jhgao@xmu.edu.cn](mailto:jhgao@xmu.edu.cn)

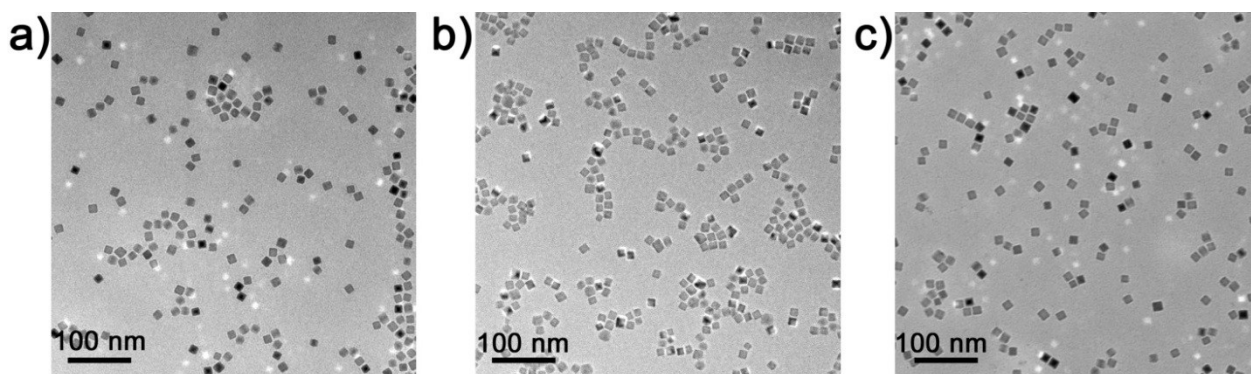

**Figure S1.** Representative TEM images of monodisperse EuIO nanocubes with different Eu molar ratios. (a) 6.4%, (b) 10.3% and (c) 15.1%, respectively. The metal concentrations were measured by ICP-AES.

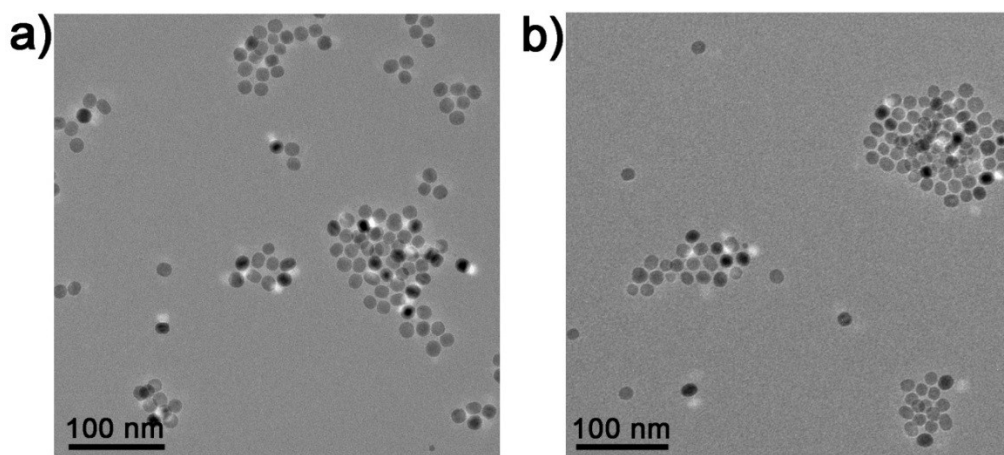

**Figure S2.** TEM images of (a)  $\text{Fe}_3\text{O}_4$  and (b)  $\text{Eu}_2\text{O}_3$  nanoparticles with similar diameter of about 14 nm.

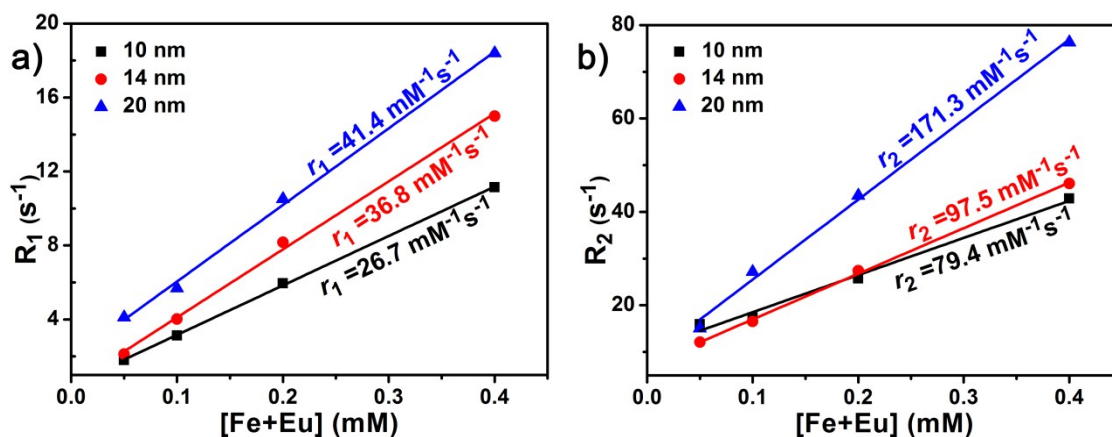

**Figure S3.** Relaxivity measurements of EuIO nanocubes with different sizes. (a)  $R_1$  and (b)  $R_2$  of 10, 14 and 20 nm EuIO nanocubes on a 0.5 T scanner. The relaxivity values  $r_1$  and  $r_2$  were obtained from the slopes of linear fits of experimental data.

**Table S1.** Comparisons of the  $r_1$  and  $r_2$  values of EuIO nanocubes with different sizes at 0.5 T.

| Sizes (nm)     | $r_1$ ( $\text{mM}^{-1}\text{s}^{-1}$ ) | $r_2$ ( $\text{mM}^{-1}\text{s}^{-1}$ ) | $r_2/r_1$ |
|----------------|-----------------------------------------|-----------------------------------------|-----------|
| <b>EuIO-10</b> | $26.74 \pm 0.33$                        | $79.44 \pm 2.29$                        | 2.97      |
| <b>EuIO-14</b> | $36.79 \pm 1.16$                        | $97.52 \pm 2.16$                        | 2.65      |
| <b>EuIO-20</b> | $41.43 \pm 1.34$                        | $171.32 \pm 4.12$                       | 4.14      |

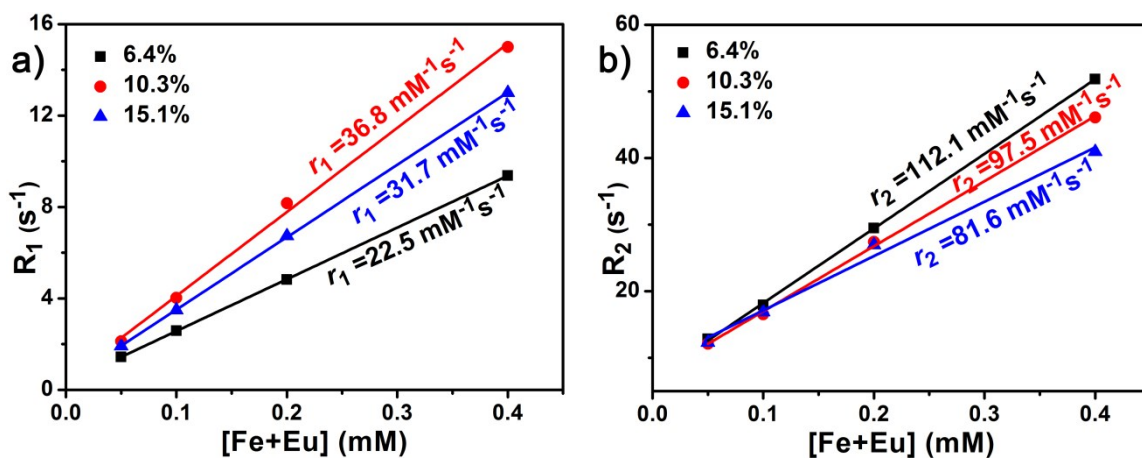

**Figure S4.** Relaxivity measurements of EuIO nanocubes with different Eu molar ratios. (a)  $R_1$  and (b)  $R_2$  of EuIO nanocubes with Eu molar ratios of 6.4%, 10.3% and 15.1% on a 0.5 T scanner.

**Table S2.** Summary of the  $r_1$  and  $r_2$  relaxivity of 14 nm sized EuIO nanocubes with different Eu molar ratios on a 0.5 T MR scanner.

| Eu molar ratios (%) | $r_1$ ( $\text{mM}^{-1}\text{s}^{-1}$ ) | $r_2$ ( $\text{mM}^{-1}\text{s}^{-1}$ ) | $r_2/r_1$ |
|---------------------|-----------------------------------------|-----------------------------------------|-----------|
| <b>EuIO-6.4</b>     | $22.51 \pm 0.46$                        | $112.07 \pm 0.97$                       | 4.98      |
| <b>EuIO-10.3</b>    | $36.79 \pm 1.16$                        | $97.52 \pm 2.16$                        | 2.65      |
| <b>EuIO-15.1</b>    | $31.68 \pm 0.25$                        | $81.63 \pm 3.15$                        | 2.57      |

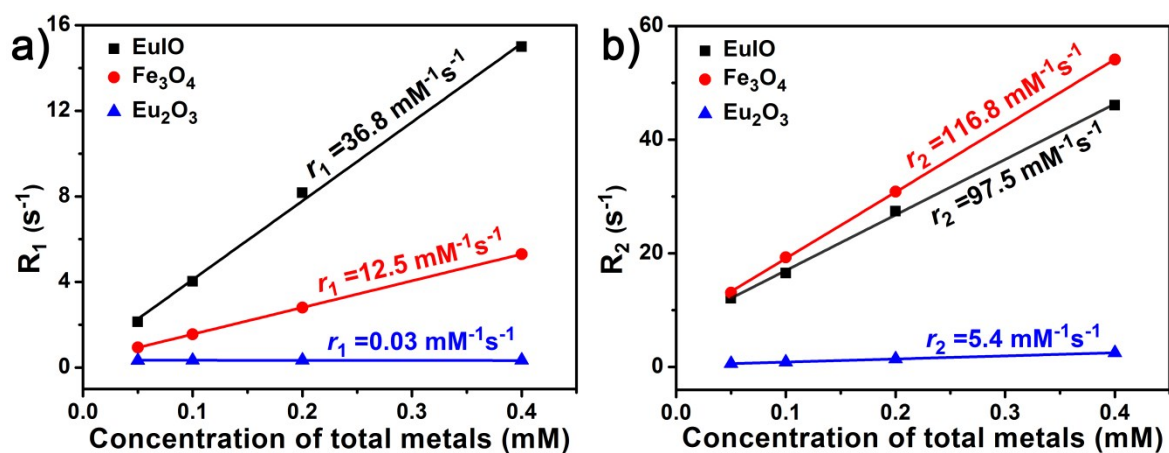

**Figure S5.** Relaxivity (a)  $r_1$  and (b)  $r_2$  values of EuIO nanocubes, Fe<sub>3</sub>O<sub>4</sub> nanoparticles and Eu<sub>2</sub>O<sub>3</sub> nanoparticles with similar size at 0.5 T.

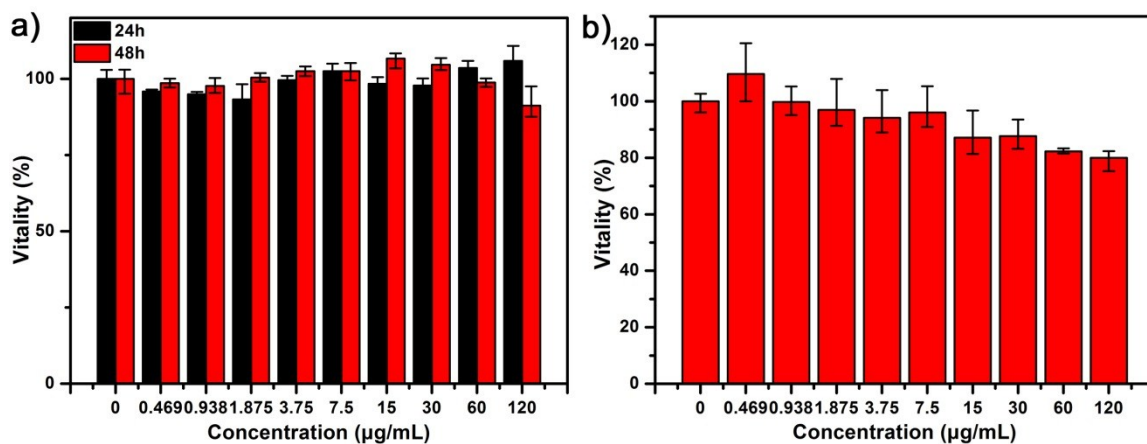

**Figure S6.** Biocompatibility of EuIO nanocubes. (a) MTT assay of SMMC-7721 cells incubated with EuIO nanocubes for 24 h and 48 h ( $n = 5/\text{group}$ ), (b) MTT assay of MRC-5 normal cells incubated with EuIO nanocubes for 24 h ( $n = 5/\text{group}$ ). Concentration correspond to total metal ions [Fe+Eu] measured by ICP-AES.

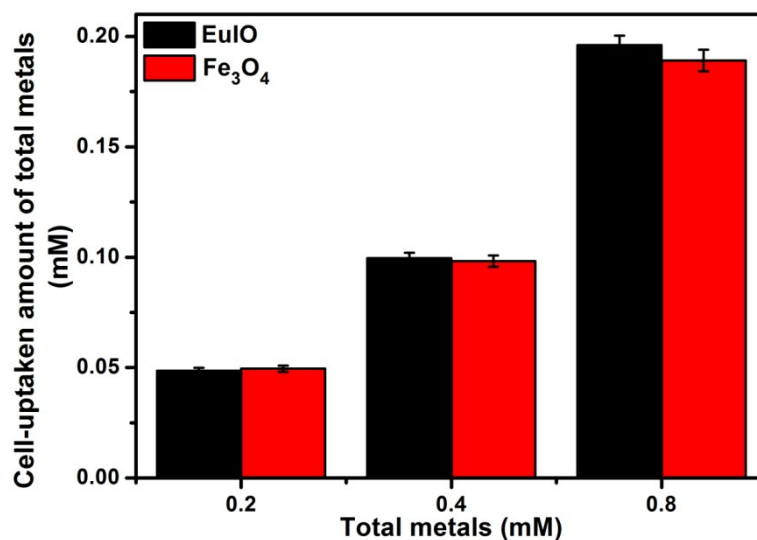

**Figure S7.** Quantitative analysis of cell uptake by ICP-MS (after subtraction of the inherent Fe inside cells) incubated with EuIO nanocubes (black) and Fe<sub>3</sub>O<sub>4</sub> (red) nanoparticles with respect to total metals.

**Table S3.** MR signal-to-noise ratio (SNR) changes of cells incubated with EuIO nanocubes and Fe<sub>3</sub>O<sub>4</sub> nanoparticles with different concentrations in  $T_1$  images ( $n = 3/\text{group}$ ). We calculated the SNR by the equation:  $\text{SNR}_{\text{cell}} = \text{SI}_{\text{cell}}/\text{SD}_{\text{noise}}$ , where SI represents signal intensity and SD represents standard deviation. The SNR changes were calculated by the equation:  $\text{SNR} = |\text{SNR}_{\text{post}} - \text{SNR}_{\text{pre}}|/\text{SNR}_{\text{pre}}$ .

| Total metals (mM)                      | SNR <sub>pre</sub> (0 mM) (%) | SNR <sub>post</sub> (%) | $\Delta\text{SNR}_{\text{post}}$ (%) |
|----------------------------------------|-------------------------------|-------------------------|--------------------------------------|
| <b>EuIO-0.2</b>                        | 100                           | 110.4±5.4               | 10.4±5.4                             |
| <b>Fe<sub>3</sub>O<sub>4</sub>-0.2</b> | 100                           | 103.6±4.3               | 3.6±4.3                              |
| <b>EuIO-0.4</b>                        | 100                           | 127.0±2.3               | 27.0±2.3                             |
| <b>Fe<sub>3</sub>O<sub>4</sub>-0.4</b> | 100                           | 105.9±3.5               | 5.9±3.5                              |
| <b>EuIO-0.8</b>                        | 100                           | 161.4±5.3               | 61.4±5.3                             |
| <b>Fe<sub>3</sub>O<sub>4</sub>-0.8</b> | 100                           | 113.5±4.5               | 13.5±4.5                             |

**Table S4.** SNR changes of cells incubated with EuIO nanocubes and Fe<sub>3</sub>O<sub>4</sub> nanoparticles with different concentrations of  $T_2$  images ( $n = 3/\text{group}$ ).

| Total metals (mM)                      | SNR <sub>pre</sub> (0 mM) (%) | SNR <sub>post</sub> (%) | $\Delta\text{SNR}_{\text{post}}$ (%) |
|----------------------------------------|-------------------------------|-------------------------|--------------------------------------|
| <b>EuIO-0.2</b>                        | 100                           | 84.6±5.3                | 15.4±5.3                             |
| <b>Fe<sub>3</sub>O<sub>4</sub>-0.2</b> | 100                           | 82.5±2.6                | 17.5±2.6                             |
| <b>EuIO-0.4</b>                        | 100                           | 68.4±3.6                | 31.6±3.6                             |
| <b>Fe<sub>3</sub>O<sub>4</sub>-0.4</b> | 100                           | 64.4±2.4                | 35.6±2.4                             |
| <b>EuIO-0.8</b>                        | 100                           | 38.0±1.4                | 62.0±1.4                             |
| <b>Fe<sub>3</sub>O<sub>4</sub>-0.8</b> | 100                           | 31.9±2.8                | 68.1±2.8                             |

**Table S5.** SNR changes of region of interests (ROIs) in  $T_1$  imaging before and after intravenous injection of EuIO nanocubes at 3 T ( $n = 3/\text{group}$ ). We calculated the SNR by the equation:  $\text{SNR}_{\text{heart}} = \text{SI}_{\text{heart}}/\text{SD}_{\text{noise}}$ .

| <b>Time (min)</b> | <b>SNR<sub>pre</sub> (%)</b> | <b>SNR<sub>post</sub> (%)</b> | <b><math>\Delta\text{SNR}_{\text{post}}</math> (%)</b> |
|-------------------|------------------------------|-------------------------------|--------------------------------------------------------|
| <b>0</b>          | 100                          | 100                           | 0                                                      |
| <b>1</b>          | 100                          | 162.2±2.9                     | 62.2±2.9                                               |
| <b>3</b>          | 100                          | 127.1±2.2                     | 27.1±2.2                                               |
| <b>5</b>          | 100                          | 119.5±1.9                     | 19.5±1.9                                               |

**Table S6.** SNR changes of ROIs in  $T_2$  imaging before and after intravenous injection of EuIO nanocubes at 3 T ( $n = 3/\text{group}$ ). We calculated the SNR by the equation:  $\text{SNR}_{\text{liver}} = \text{SI}_{\text{liver}}/\text{SD}_{\text{noise}}$ .

| <b>Time (min)</b> | <b>SNR<sub>pre</sub> (%)</b> | <b>SNR<sub>post</sub> (%)</b> | <b><math>\Delta\text{SNR}_{\text{post}}</math> (%)</b> |
|-------------------|------------------------------|-------------------------------|--------------------------------------------------------|
| <b>0</b>          | 100                          | 100                           | 0                                                      |
| <b>30</b>         | 100                          | 45.2±2.6                      | 54.8±2.6                                               |
| <b>90</b>         | 100                          | 22.7±1.6                      | 77.3±1.6                                               |
| <b>150</b>        | 100                          | 31.1±1.3                      | 68.9±1.3                                               |
